# Supplementary material for: Protease-activated indocyanine green nanoprobes for intraoperative NIR fluorescence imaging of primary tumors
Source: Royal Society of Chemistry journal article supplement (doi:10.1039/d2na00276k), 2022-01-01
Supplement: d2na00276k1.pdf [file d2na00276k1.pdf]

### Supplementary data

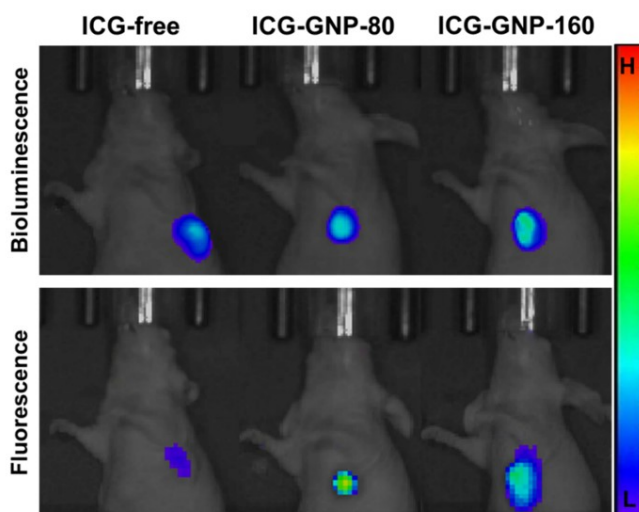

**Fig. S1** Representative bioluminescence and fluorescence images of tumor-bearing mice. The bioluminescence was acquired after treating the mice with *D*-luciferin (150 mg/kg) for 15 min. The fluorescence was acquired 24 hours after administering ICG-free, ICG-GNP-80, or ICG-GNP-160 dosed at 2 mg/kg ICG.

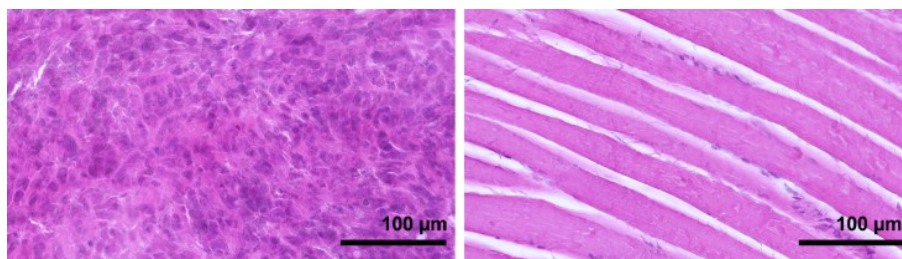

**Fig. S2** Representative histological images of the resected tumor (left) and healthy muscle tissue (right) after H&E staining.
